# Supplementary material
Source: publisher site journal article supplement (http://www.degruyter.com/publication/journal_key/MATH/downloadAsset/MATH_CFP_Contemporary_Developments_in_Graph_Topological_Indices.pdf)
Supplement: Supplementary file 1 [file MATH_CFP_Contemporary_Developments_in_Graph_Topological_Indices.pdf]

# CONTEMPORARY DEVELOPMENTS IN GRAPH TOPOLOGICAL INDICES

Special Issue in Open Mathematics

## GUEST EDITOR

**Darko Dimitrov**, Faculty of Information Studies, Novo Mesto, Slovenia;  
e-mail: [darko.dimitrov11@gmail.com](mailto:darko.dimitrov11@gmail.com)

**Zhibin Du**, School of Software, South China Normal University, Foshan, Guangdong, China;  
e-mail: [zhibindu@126.com](mailto:zhibindu@126.com)

## DESCRIPTION

We invite researchers and scholars to contribute to our upcoming special edition, "Contemporary Developments in Graph Topological Indices," which promises to be a vibrant platform for exploring **the latest advancements in graph theory and its applications**. This edition will focus on the dynamic field of graph topological indices, shedding light on **emerging trends, novel methodologies, and diverse applications** in this interdisciplinary area.

**Graph topological indices** are essential tools for unravelling the structural properties of networks, and their significance spans various domains, including chemistry, biology, computer science, and social networks. We encourage submissions that present innovative research, theoretical foundations, and practical insights into the world of topological indices. Whether you are delving into advanced mathematical techniques or addressing real-world challenges, this edition is the perfect opportunity to showcase your contributions to the field.

Join us in shaping the future of graph theory by sharing your expertise in "Contemporary Developments in Graph Topological Indices." We welcome original research articles/reviews/case studies/open problems that contribute to the growing body of knowledge in this domain. By participating in this **special edition in the journal [Open Mathematics](https://www.degruyter.com/math)**, you will have the chance to engage with fellow researchers and help drive the evolution of graph theory in the modern era.

Authors are requested to submit their full revised papers complying the general scope of the journal. The submitted papers will undergo the standard peer-review process before they can be accepted. Notification of acceptance will be communicated as we progress with the review process.

## HOW TO SUBMIT

---

Before submission authors should carefully read the [Instruction for Authors](#).

Manuscripts can be written in TeX, LaTeX (the journal's [LATEX template](#) is recommended, but not obligatory). Please note that we do not accept papers in Plain TEX format. Text files can be also submitted as standard DOCUMENT (.DOC) which is acceptable if the submission in LATEX is not possible. **For an initial submission, the authors are strongly advised to upload their entire manuscript, including tables and figures, as a single PDF file.**

All submissions to the Special Issue must be made electronically via **online submission system Editorial Manager**: [www.editorialmanager.com/openmath](http://www.editorialmanager.com/openmath).

All manuscripts will undergo the standard peer-review process (single blind, at least two independent reviewers). When entering the submission via online submission system authors should choose the option/category "*Special Issue on Contemporary Developments in Graph Topological Indices*."

Submission of a manuscript implies that the work described has not been published before and it is not under consideration for publication anywhere else.

**The deadline for submissions is April 15, 2024**, but individual papers will be reviewed and published online on an ongoing basis.

Contributors to the Special Issue will benefit from:

- **fair and constructive peer review**
- **quick online publication** of accepted papers (continuous publication model)
- language correction services for authors from non-English speaking regions
- no limitations on colour figures and word count in published articles
- all articles are freely available to the academic community worldwide without any restrictions
- promotion of published papers to readers and citers
- distribution to open access directories (such as DOAJ) and thousands of libraries worldwide
- **liberal policies on copyrights** (authors retain copyright) and on self-archiving (no embargo periods) ([License to Publish](#) (CC-BY))
- secure archiving by De Gruyter and the independent archiving service [Portico](#)

We are looking forward to your submission!

In case of any questions please contact **Dr. Justyna Żuk**, [Justyna.Zuk@degruyter.com](mailto:Justyna.Zuk@degruyter.com) (Managing Editor of Open Mathematics).
